# Supplementary material for: Biphasic Mathematical Model of Cell–Drug Interaction That Separates Target-Specific and Off-Target Inhibition and Suggests Potent Targeted Drug Combinations for Multi-Driver Colorectal Cancer Cells
Source: MDPI journal article supplement (doi:10.3390/cancers12020436), 2020-02-13
Supplement: s1 [file s1]

## Supplementary Materials 1:

**Fig. S1. Analysis of HT-29 dose-dependent inhibition by protein kinase inhibitors.** The dose response data (closed circles) of HT-29 cells to AZD-6244 (A), BMS-754807 (B), dasatinib (C), and HG6-64-1 (D) were curve-fitted to the monophasic kinetic equation  $I = [D] / ([D] + IC_{50})$  (dashed line) and the Hill equation  $I = I_{max} \times D^n / (IC_{50}^{*n} + D^n)$  (solid line). The parameters obtained from curve-fitting are presented in the graphs (dashed line parameters in the upper right corners, and the solid line parameters in the bottom left corners).

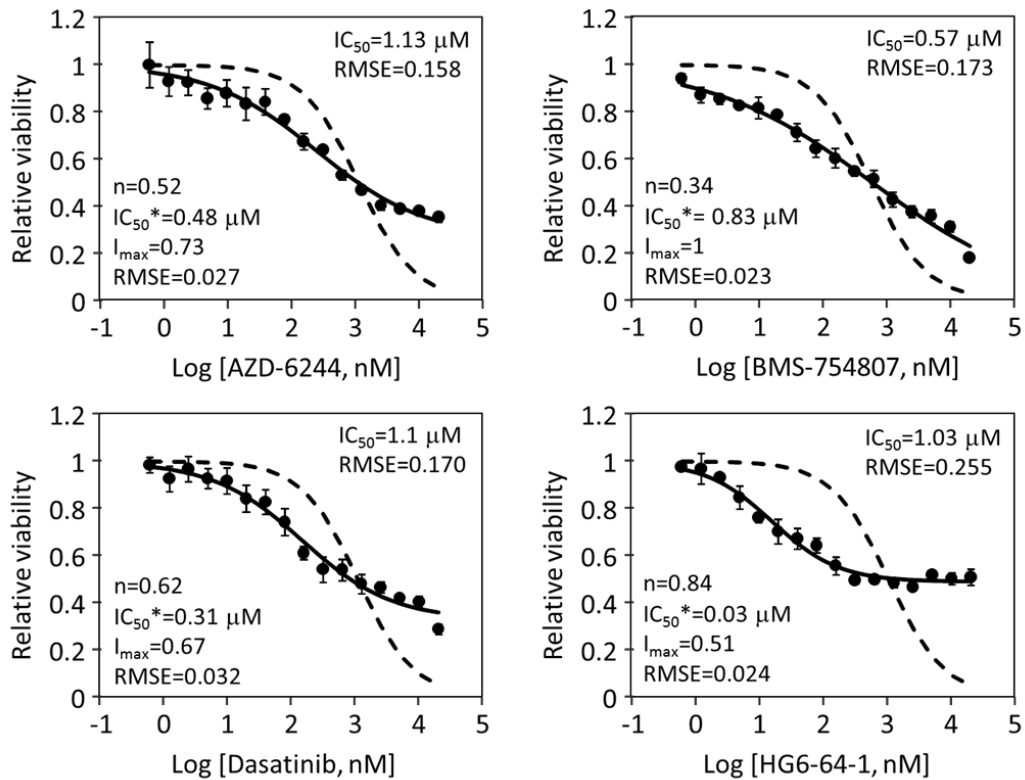

**Fig. S2. Full pictures of Western blot analyses of selected kinase inhibitors on HT-29 cell line signaling.** These are the full pictures of the Western blot results used to generate Fig. 2C.

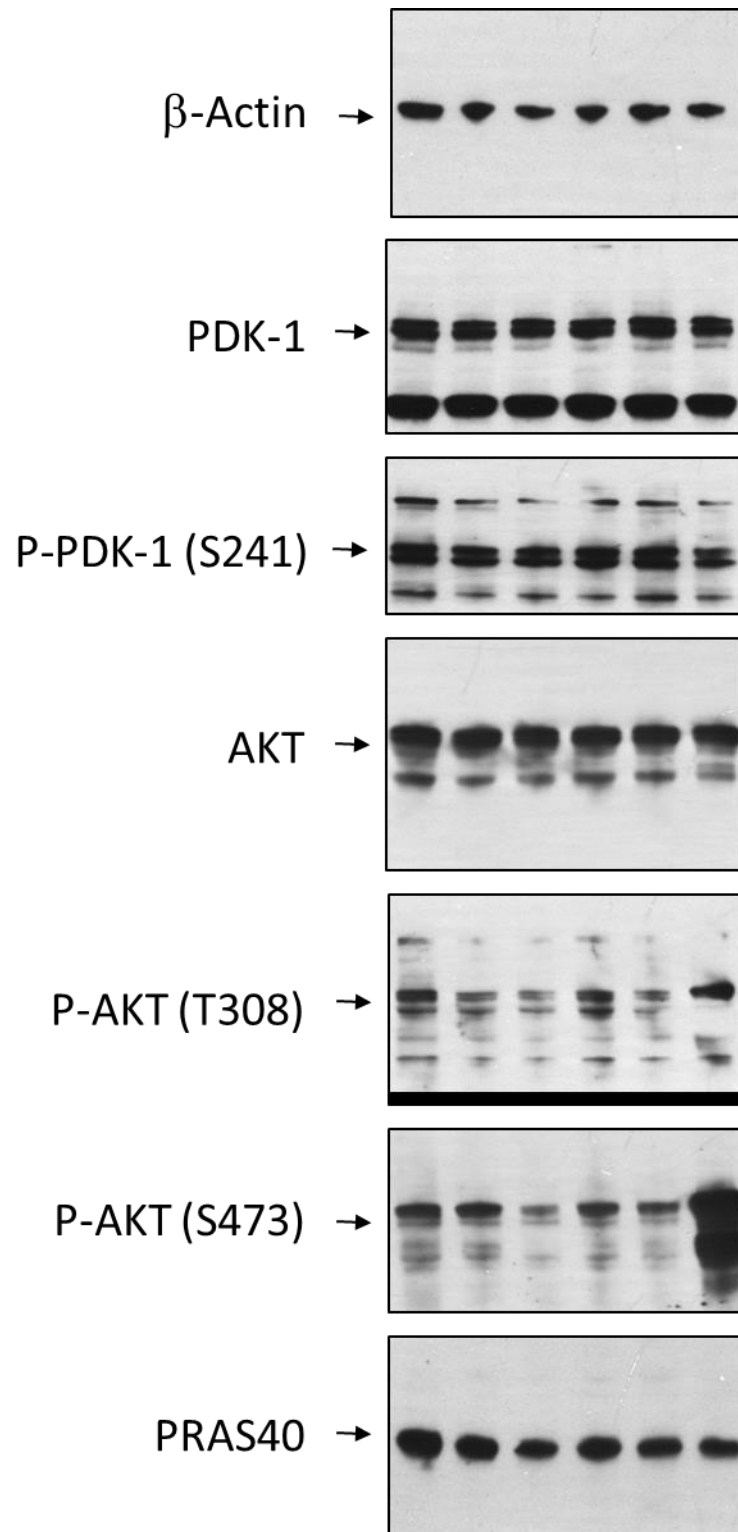

P-PRAS40  
(T246)

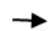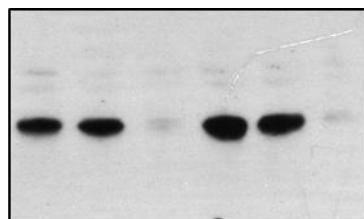

GSK-3 $\beta$

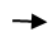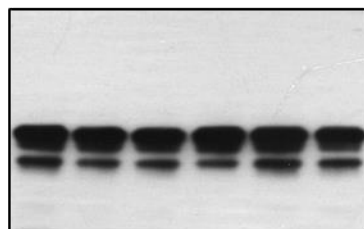

P-GSK-3 $\beta$  (S9)

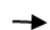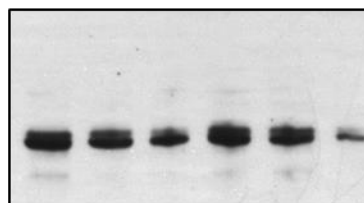

BRAF

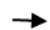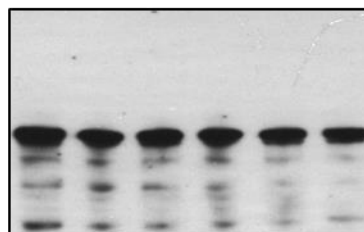

P-BRAF(S445)

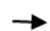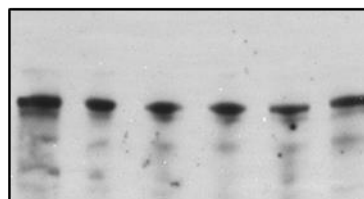

MEK1/2

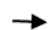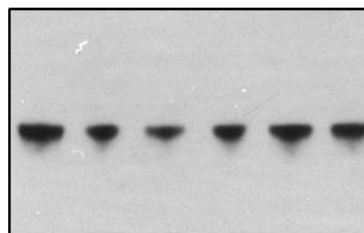

P-MEK1/2  
(S217/221)

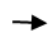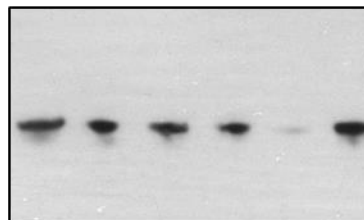

ERK1/2 →

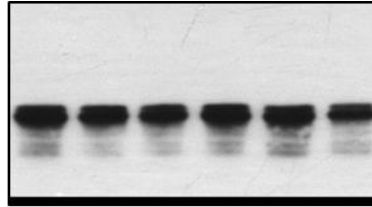

P-ERK1/2  
(T202/Y204) →

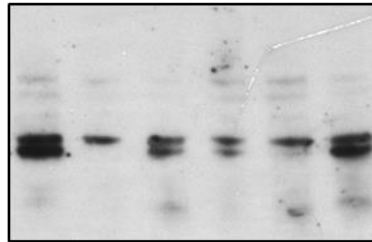

Src →

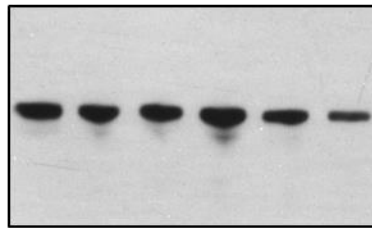

P-Src (Y416) →

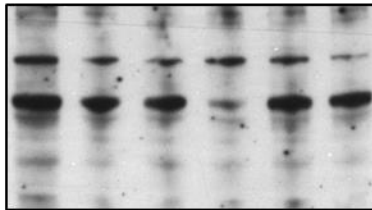

P-Src (Y527) →

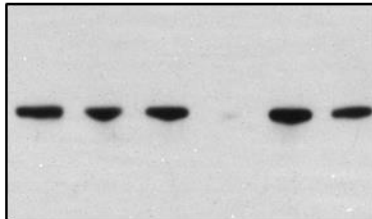

**Fig. S3. Western blot analysis of total and phosphorylated insulin receptor and IGF-1R levels in HT-29 cells treated by different kinase inhibitors.** Treatment and Western blot analysis were carried out as described in the legend to Fig 2. In each image, the top band corresponds to the size of the receptor.

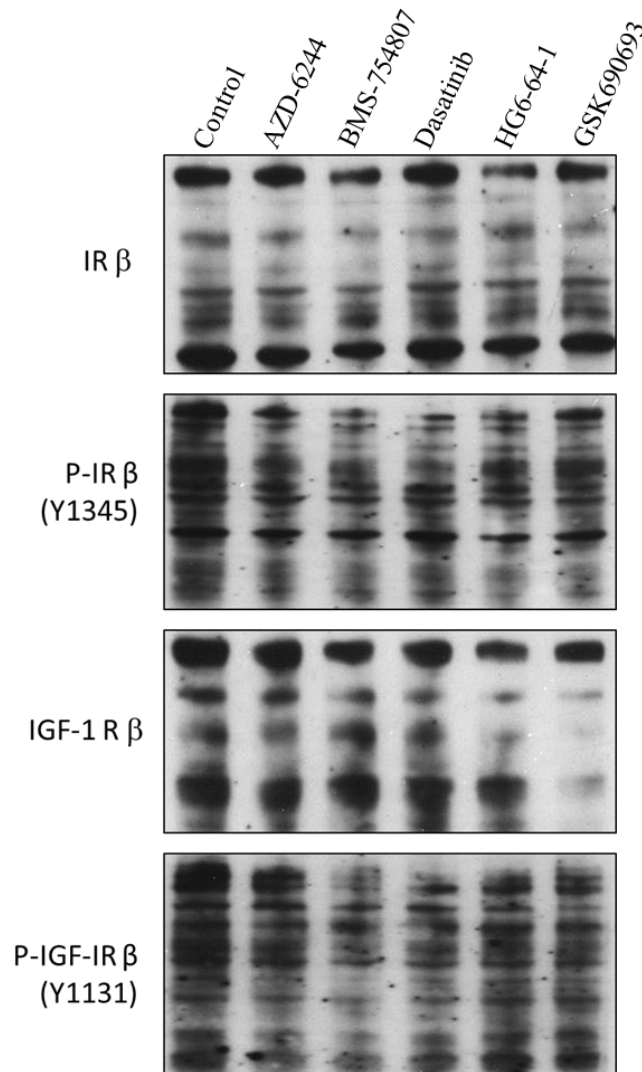

**Fig. S4. Full pictures of Western blot analyses of selected kinase inhibitors on HCC-827 cell line signaling.** These are the full pictures of the Western blot results used to generate Fig. 6F.

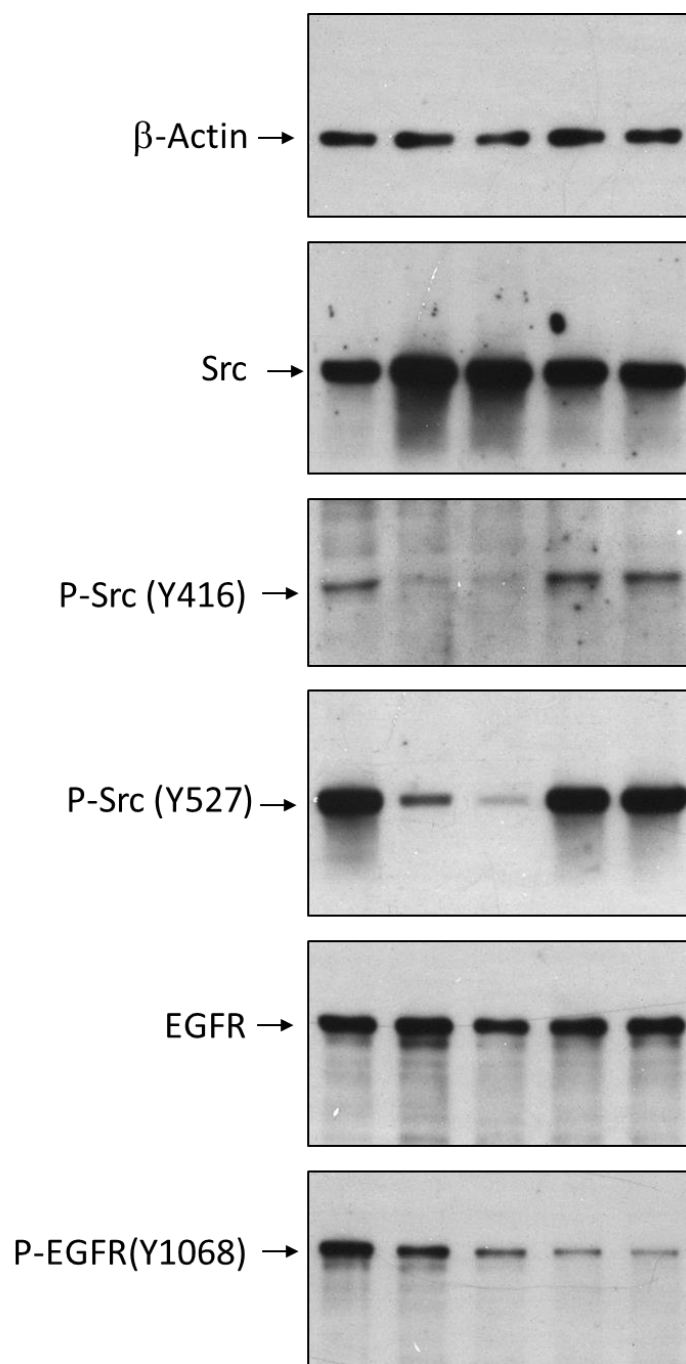

P-EGFR(Y1086) →

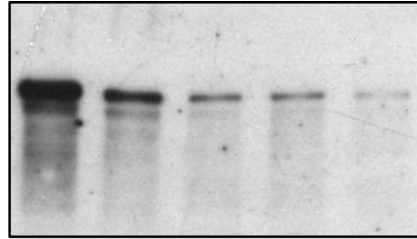

P-EGFR(Y845) →

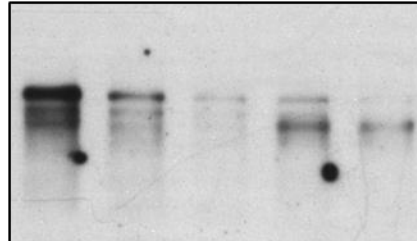

MEK1/2 →

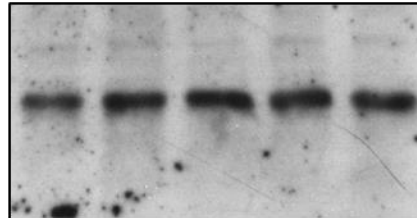

P-MEK(S217/221) →

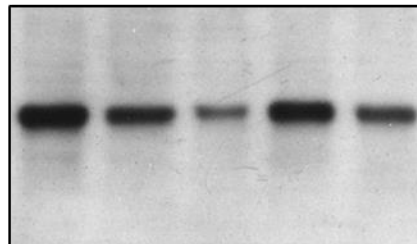

ERK1/2 →

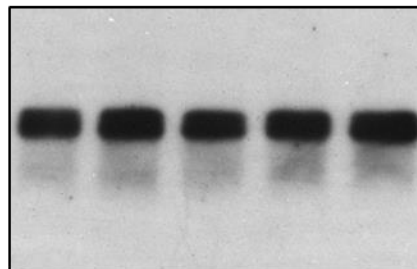

P-ERK(T202/Y204) →

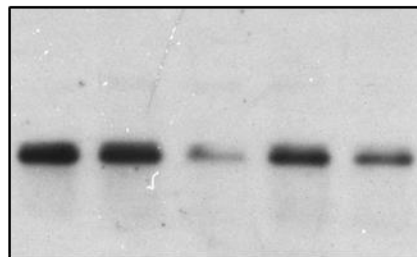

AKT →

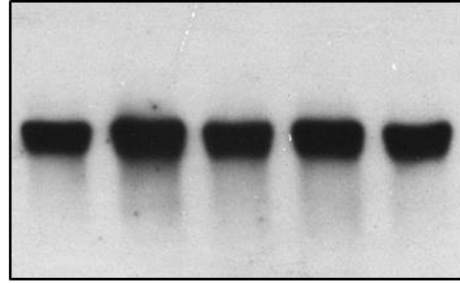

P-AKT(T308) →

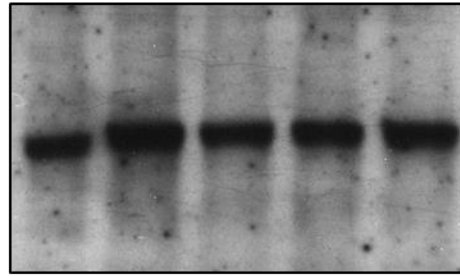

P-AKT (S473) →

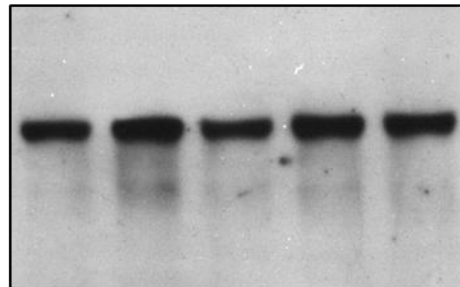

PRAS40 →

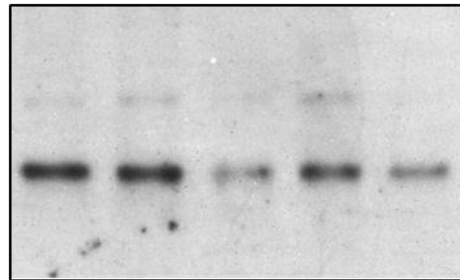

P-PRAS40(T246) →

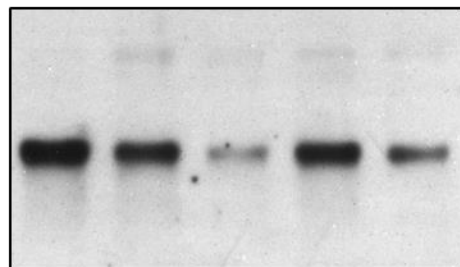

**Table S1. Densitometry analyses of the band density presented in Fig. 2C.** The densities of appropriate bands in 2C were analyzed using the ImageJ software. For each protein, the six bands for all treatments were analyzed using the same analysis box containing the whole band. The densities were compared to the control (no drug treatment) and normalized to the loading control,  $\beta$ -actin. The number above 2 is labeled green, and the numbers below 0.5 are labeled red.

|                      | Control | AZD-6244 | BMS-754807 | Dasatinib | HG6-64-1 | GSK690693 |
|----------------------|---------|----------|------------|-----------|----------|-----------|
| $\beta$ -actin       | 1       | 1        | 1          | 1         | 1        | 1         |
| PDK-1                | 1       | 1.046104 | 1.159111   | 1.147543  | 1.059144 | 1.034902  |
| P-PDK-1 (S241)       | 1       | 1.072759 | 1.122446   | 1.156274  | 1.005551 | 0.904825  |
| AKT                  | 1       | 1.131456 | 1.20131    | 1.20525   | 0.980167 | 1.177483  |
| pAKT(T308)           | 1       | 0.652152 | 0.484466   | 0.998284  | 0.452613 | 1.406799  |
| pAKT(S473)           | 1       | 1.20339  | 0.707887   | 1.124539  | 0.823294 | 2.463198  |
| PRAS40               | 1       | 1.095238 | 0.947064   | 1.078976  | 0.859161 | 0.876639  |
| P-PRAS40 (T246)      | 1       | 1.308334 | 0.253356   | 1.644941  | 1.27588  | 0.163201  |
| GSK-3 $\beta$        | 1       | 1.207881 | 1.250831   | 1.28183   | 1.085261 | 1.100336  |
| P-GSK-3 $\beta$ (S9) | 1       | 1.0629   | 0.838327   | 1.254432  | 0.962482 | 0.451151  |
| BRAF                 | 1       | 0.995861 | 1.112981   | 1.022657  | 0.825885 | 0.912292  |
| P-BRAF (S445)        | 1       | 0.794982 | 0.860506   | 0.743535  | 0.564455 | 0.928068  |
| MEK 1/2              | 1       | 0.872611 | 0.858911   | 0.985739  | 0.944587 | 1.176941  |
| P-MEK 1/2 (S217/221) | 1       | 0.971807 | 1.062488   | 0.860634  | 0.209916 | 1.261475  |
| ERK 1/2              | 1       | 1.139803 | 1.174971   | 1.233042  | 1.059567 | 1.040788  |
| P-ERK (T202/Y204)    | 1       | 0.386077 | 0.730268   | 0.484445  | 0.510203 | 1.136269  |
| Src                  | 1       | 1.130438 | 1.191662   | 1.426501  | 0.898991 | 0.745081  |
| P-Src (Y416)         | 1       | 0.858366 | 0.993353   | 0.469683  | 0.924531 | 0.942216  |
| P-Src (Y527)         | 1       | 1.01375  | 1.334623   | 0.223951  | 1.214101 | 1.054115  |

**Table S2. Densitometry analyses of the band density presented in Fig. 6F.** The densities of appropriate bands in Fig. 6F were analyzed using the ImageJ software. For each protein, the five bands for all treatments were analyzed using the same analysis box containing the whole band. The densities were compared to the control (no drug treatment) and normalized to the loading control,  $\beta$ -actin. The numbers below 0.5 are labeled red.

|                       | Control | Dasa400  | Dasa800  | Gef50    | Gef100   |
|-----------------------|---------|----------|----------|----------|----------|
| $\beta$ -actin        | 1       | 1        | 1        | 1        | 1        |
| Src                   | 1       | 1.454739 | 1.812509 | 1.143042 | 1.291881 |
| p-Src (Y416)          | 1       | 0.7168   | 0.944469 | 1.163292 | 1.193636 |
| P-Src (Y527)          | 1       | 0.239669 | 0.070064 | 0.805882 | 0.99858  |
| EGFR                  | 1       | 1.16889  | 0.978319 | 0.86922  | 1.072395 |
| P-EGFR (Y1068)        | 1       | 0.678677 | 0.408403 | 0.17699  | 0.208516 |
| P-EGFR (Y1086)        | 1       | 0.458206 | 0.212859 | 0.07919  | -0.05193 |
| P-EGFR (Y845)         | 1       | 0.400548 | 0.089934 | 0.115503 | -0.01864 |
| MEK 1/2               | 1       | 1.194331 | 1.567552 | 1.04764  | 1.218064 |
| P-MEK 1/2 (S217/S221) | 1       | 0.719851 | 0.452104 | 0.692377 | 0.473383 |
| ERK 1/2               | 1       | 1.137153 | 1.341201 | 0.962051 | 1.240311 |
| P-ERK 1/2 (T202/Y204) | 1       | 0.973838 | 0.341771 | 0.684984 | 0.465598 |
| AKT                   | 1       | 1.117882 | 1.312981 | 0.944923 | 1.001151 |
| P-AKT (T308)          | 1       | 1.158578 | 1.29545  | 0.903416 | 1.086385 |
| PAKT (S473)           | 1       | 1.170423 | 1.219307 | 1.034177 | 1.104584 |
| PRAS40                | 1       | 1.007558 | 0.412679 | 0.628671 | 0.288923 |
| P-PRAS40 (T246)       | 1       | 0.693183 | 0.210193 | 0.624464 | 0.259739 |
